# Supplementary material for: Strains of Staphylococcus aureus that Colonize and Infect Skin Harbor Mutations in Metabolic Genes
Source: PubMed Central journal article supplement — iScience. 2019 Jul 26;19:281–90. doi: 10.1016/j.isci.2019.07.037 (PMC6700416; doi:10.1016/j.isci.2019.07.037), 2019-07-26
Supplement: mmc1.pdf [file mmc1.pdf]

ISCI, Volume 19

## Supplemental Information

**Strains of *Staphylococcus aureus***

**that Colonize and Infect Skin**

**Harbor Mutations in Metabolic Genes**

**Karen P. Acker, Tania Wong Fok Lung, Emily West, Joshua Craft, Apurva Narechania, Hannah Smith, Kelsey O'Brien, Ahmed M. Moustafa, Christine Lauren, Paul J. Planet, and Alice Prince**

**Table S1.** Primers used for PCR amplification. Related to Figure 1.

| <b>Locus</b>              | <b>Primer Sequence (5'-3')</b>                                | <b>Amplicon size</b> | <b>Source</b>               |
|---------------------------|---------------------------------------------------------------|----------------------|-----------------------------|
| <b><i>spa</i></b>         | AACATAGAATTCGCGCAACACGATGAAG<br>CCAATACTCGAGTAGTTCGCGACGACG   | <b>1.3 kb</b>        | <b>This study</b>           |
| <b><i>sea</i></b>         | TTGGAAACGGTTAAAACGAA<br>GAACCTTCCCATCAAAAACA                  | <b>120 bp</b>        | <b>Johnson et al., 1991</b> |
| <b><i>seb</i></b>         | TCGCATCAAACGACAAACG<br>GCAGGTACTCTATAAGTGCC                   | <b>478 bp</b>        | <b>Johnson et al., 1991</b> |
| <b><i>sek</i></b>         | GGAGAAAAGGCAATGAA<br>TAGTGCCGTTATGTCCA                        | <b>516 bp</b>        | <b>Bania et al., 2016</b>   |
| <b><i>Seq</i></b>         | GGAATTACGTTGGCGAA<br>AACTCTCTGCTTGACCA                        | <b>330 bp</b>        | <b>Bania et al., 2016</b>   |
| <b><i>sek and seq</i></b> | TAGCATATGCTGATGTAGG<br>AAATATCGACATCCAAATGG                   | <b>1.5 kb</b>        | <b>This study</b>           |
| <b><i>IS256</i></b>       | CTAATGGAAAATCAACGAACAG<br>GAATAATCTTTTCTCTTCTGCG              | <b>955 bp</b>        | <b>This study</b>           |
| <b><i>PVL</i></b>         | ATCATTAGGTAAAATGTCTGGACATGATCCA<br>GCATCAASTGTATTGGATAGCAAAGC | <b>433 bp</b>        | <b>This study</b>           |
| <b><i>speG</i></b>        | GCCTTATGAATCCTTAACGGAAC<br>TCTGTTTTAAATCCTTGTGACTCG           | <b>498 bp</b>        | <b>This study</b>           |

**Table S2.** Genome sequence analysis. Related to Figure 1.

| Strain | Strain | Coverage on reference | Reference positions touched | de novo contigs >200 nucs | N50    | Total assembly size | accession    |
|--------|--------|-----------------------|-----------------------------|---------------------------|--------|---------------------|--------------|
| PE001  | 6-201  | 129.5097133           | 0.955708401                 | 53                        | 148454 | 2796914             | SAMN10689348 |
| PE002  | 16-660 | 308.4103519           | 0.929297595                 | 49                        | 120637 | 2712274             | SAMN10689358 |
| PE003  | 23-977 | 226.33487             | 0.910541732                 | 57                        | 115112 | 2828524             | SAMN10689363 |
| PE004  | 24-859 | 190.2588002           | 0.915070234                 | 416                       | 12627  | 2695998             | SAMN10689365 |
| PE005  | 31-921 | 146.1693183           | 0.939041705                 | 68                        | 103413 | 2782563             | SAMN10689370 |
| PE006  | 40-808 | 177.5429384           | 0.918942955                 | 56                        | 105735 | 2796571             | SAMN10689380 |
| PE007  | 44-398 | 206.621994            | 0.901813315                 | 74                        | 115135 | 2757172             | SAMN10689385 |
| PE008  | 48-634 | 390.3148304           | 0.918614717                 | 71                        | 84800  | 2880647             | SAMN10689389 |
| PE009  | 43-121 | 351.3036432           | 0.956912404                 | 72                        | 86961  | 2736934             | SAMN10689383 |
| PE010  | 64-515 | 166.089783            | 0.916041721                 | 70                        | 77982  | 2726169             | SAMN10689408 |

**Table S3.** Primers used for qRT-PCR. Related to Figure 2.

| Gene        | Primer sequences (5' – 3')                                     |
|-------------|----------------------------------------------------------------|
| <i>gltA</i> | Forward: GATCTAGCTGAAAACGCGCA<br>Reverse: CTGTCATTGGATGCACGTGA |
| <i>acnA</i> | Forward: GCAAACATGGCACCAGAGTA<br>Reverse: TTTGGTCCTGAAAGCGATGC |
| <i>lcd</i>  | Forward: CCAGCTGAGCATGATGTTGT<br>Reverse: GGAGCTGTACCATGTGTTGC |
| <i>sucA</i> | Forward: GCCGTGTTACATGATGAGCA<br>Reverse: CACCATATTGCGCTTCCCAA |
| <i>sucB</i> | Forward: TGCTATCATCGGCGAAGGTA<br>Reverse: TGACACCATTTTCACGAGCA |
| <i>sucC</i> | Forward: TAGAGGTAAAGCAGGCGGAG<br>Reverse: CCCTTCTTCAGACGCCATCA |
| <i>sucD</i> | Forward: GGACCACGTATGCCAGAGAA<br>Reverse: CTGTAAGCCACCAGTACCCA |
| <i>sdhB</i> | Forward: GGACCACGTATGCCAGAGAA<br>Reverse: CTGTAAGCCACCAGTACCCA |
| <i>sdhA</i> | Forward: TGTATGGTGGCGACTTCCTT<br>Reverse: TTGTTGTCCAGTTGTTGCC  |
| <i>fumC</i> | Forward: ATGCTTGACCGTTGCGAAAT<br>Reverse: AGCGCCTTCAATGTTCCATG |
| <i>menD</i> | Forward: ATCGTTTCAACTGCACTGGG<br>Reverse: AAATACCGCCACCATCGTTG |
| <i>hemA</i> | Forward: GCCAGGGTTAAGCGAAAGAG<br>Reverse: CTTGCTTGCTCATGAGGAC  |
| <i>hemB</i> | Forward: TTGCTGAAATTCGTCGTGGA<br>Reverse: TCATCATGTGCGACCCTTCT |
| 16S rRNA    | Forward: GCGCTGCATTAGCTAGTTGGT<br>Reverse: GGCCGATCACCTCTCA    |

Figure S1.

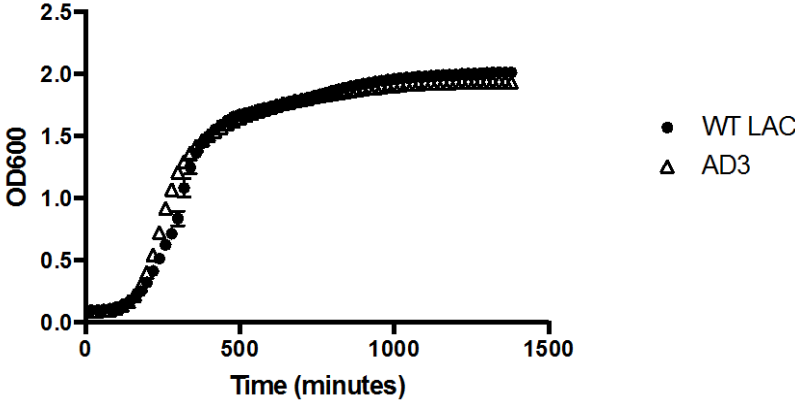

Figure S1. Growth curves of AD3 and WT LAC growth curve grown aerobically in LB. Related to Figure 4 .

## **Transparent Methods**

### **Contact for Reagent and Resource Sharing**

Further information and requests for resources and reagents should be directed to and will be fulfilled by the Lead Contact, Alice Prince (asp7@cumc.columbia.edu).

### **Experimental Model and Subject Details**

#### **Human**

Isolates of *S. aureus* were obtained from male and female patients aged 0 to 18 years with AD who presented to Columbia University Medical Center Department of Dermatology. To screen patients for *S. aureus*, a dry, sterile swab (rayon with Amies transport medium, HealthLink) was used to culture from the anterior nares, perianal skin, and one or more skin areas with clinically active AD, clinical evidence of infection, or eroded skin. Swabs were sent to the institution's microbiology lab for routine processing and testing. Severity of AD was quantified by EASI score (Hanifin et al., 2001). Exclusion criteria for screening included age greater than 18 years, inconclusive diagnosis of atopic dermatitis, evidence of acute systemic illness, current use of systemic antibiotics, fungal or viral skin infection, and any individual who declined to participate. Inclusion criteria for microbiological evaluation included laboratory detection of *S. aureus* on culture. All data were collected following approval from Columbia University Institutional Review Board (AAAI5956). Informed consent was obtained from all subjects.

#### **Animal**

Male and female mice C57BL/6J mice were purchased from the Jackson Laboratory and were housed under standard conditions at Columbia University Medical Center in New York, NY. All animal experiments were carried out in strict accordance with the recommendations in the Guide for the Care and Use of Laboratory Animals of the NIH, the Animal Welfare Act, and U.S. federal law. The Institutional Animal Care and Use Committee of Columbia University approved the protocol (AAAR5412). None of the mice used in our experiments were previously used for other procedures. Six- to 8-week-old healthy sex-matched mice were inoculated intradermally on the back with  $1 \times 10^7$  CFUs *S. aureus* WT LAC or clinical isolates in 100  $\mu$ L PBS. PBS alone was used as a control. For the memory experiments, mice were initially infected with PBS, WT LAC, or clinical isolate AD3 and re-challenged with WT LAC on day 28 after initial infection. Dermonecrosis areas were measured daily up to 10 days. Punch biopsies (5 mm)

were taken at the site of dermonecrosis and homogenized through 40-mm filters for recovery of *S. aureus*, immune cells by flow cytometry, or supernatant for cytokine analysis.

### **Cell lines**

Human primary keratinocytes (HEKn) were purchased from Gibco and grown in DermaLife K complete medium (Lifeline Cell Technology) supplemented with growth factors (DermaLife K LifeFactors kit, Lifeline Cell Technology), 1% fetal bovine serum (FBS, Gibco) and 1% penicillin/streptomycin (Corning) in a humidified incubator at 37°C with 5% CO<sub>2</sub> and were used up to passage 8. HEKn cells were plated 24hrs prior to infection without antibiotics to achieve 3x10<sup>5</sup> cells/ml for Seahorse analysis or 4x10<sup>5</sup> cells/ml for all other experiments.

### **Bacterial strains**

*S. aureus* strains were grown at 37°C with shaking in Luria-Bertani broth (LB, BD). Bacterial inocula were estimated based on OD<sub>600</sub> and verified by retrospective plating on LB agar plates to determine colony forming units (CFU). *S. aureus* recovered from mouse skin biopsies were serially diluted and plated on BBL CHROMagar Staph aureus plates and enumerated by counting CFUs.

## **Method Details**

### **Gene detection**

*Spa* types were obtained by PCR amplification and sequencing of the variable 16S ribosomal rRNA gene region, and assigned according to the Ridom web server (<http://www.spaserver.ridom.de>). Isolates were assigned a clonal complex using whole genome sequencing (see below). PCR amplification was performed to screen for genes encoding staphylococcus protein A (*spa*), staphylococcal enterotoxin A (*sea*), VB (*seb*), VK (*sek*), VQ (*seq*), presence of both *sek* and *seq*, exotoxin G (*speG*), *IS256*, and Panton-Valentine leucocidin (*PVL*) using an Applied Biosystems Veriti 96-Well Thermal Cycler (Life Technologies). Primer sets are available in Table S1. Genomic DNA was prepared from liquid culture following digestion with 50µM Tris-HCL-10 µM EDTA, 0.3 mg/ml lysostaphin, and 8 units/µL mutanolysin for 1 hour at 37 °C. DNA was extracted using a DNA Blood and Tissue kit (Qiagen) or Wizard Genomic DNA Purification Kit (Promega). PCR was performed in a 50-µL (for *spa*) or 20-µL (for all other gene targets) reaction mixture at the following amplification for 30 cycles: 30 sec-1 m of denaturation at 95°C, 1

m of annealing at 55°C, 2-4 m of extension at 72°C. All Genomic preparations were outsourced for sequencing of *spa* (Genewiz, Inc.).

### **Whole genome sequencing**

Whole genome sequencing was performed on ten *S. aureus* samples cultured from the skin of patients with high and low EASI scores. DNA was quantified using the Qubit dsDNA High Sensitivity Assay Kit and Qubit Fluorometer (Invitrogen, Life Technologies). Indexed paired-ended libraries were prepared from purified DNA using Nextera XT DNA Sample Preparation Kit according to the manufacturing directions though during PCR clean-up the samples were resuspended in 32.5 µL Resuspending Buffer and only 30 µL of the sample was transferred to the Clean Amplified NTA Plate. The resulting libraries were quantified using the Qubit dsDNA High Sensitivity DNA Kit. Samples were sequenced using pooled paired-end 250 bp runs on the MiSeq Benchtop Sequencer (Illumina Inc.) and data were generated in fastq files for subsequent analysis.

### **Genome sequence analysis**

The paired-end tag reads were assembled *de novo* using ABySS 1.3.2 software and the assembly parameter  $k=47$  (Simpson et al., 2009) (Table S2). Genomes were annotated and compared to known *S. aureus* sequences using the Rapid Annotation using Subsystem Technology (RAST) server (Aziz et al., 2008). Sequences were investigated by employing the protein-specific Basic Local Alignment Search Tool (BLASTP) within GenBank (Altschul et al., 1997) and were considered present if sequence identity was  $\geq 95\%$  with reference gene sequence. Genomes were assigned sequence types (ST) and clonal complexes (CC) by the *S. aureus* MLST typing scheme (available at: <https://pubmlst.org/saureus/>) (Jolley and Maiden, 2010) using the MLST typing perl script v. 2.16.1 for contigs (available at: <https://github.com/tseemann/mlst>) (database updated 12/12/2018).

### **Phylogenetic Analysis**

We produced two kinds of phylogenetic matrices for comparison, (i) a nucleotide reference-based SNP matrix (NUC-SNP), (ii) an amino acid-based, concatenated, orthologous, open-reading-frame matrix (AA-ORF). For the NUC-SNP matrix, SNP calling was performed using SAMtools and MUMmer software on previously sequenced whole gene alignments against the reference genome of USA300 strain TCH1516 (Kurtz et al., 2004; Li et al., 2009). We excluded SNPs that were not biallelic, listed as “heterozygous”, or



had a per base Q score greater than or equal to 20. For preassembled genomes available from public databases, we used whole-genome alignment with reference to the *S. aureus* TCH1516 genome using the show-snps utility of NUCmer (<http://mummer.sourceforge.net>). Phylogenetic matrices were created by combining results of both SNP calling techniques above. We excluded all regions from the reference genome that have been annotated as mobile genetic elements as previously described (Planet et al., 2015), and we also applied a mask that excluded repetitive sequences from the reference genome that were more than 80% identical at the nucleotide level to another portion of the genome over at least 100 bp in length. For the AA-ORF matrix we determined orthologous gene sets from assembled *S. aureus* isolate genomes using a modified version of the OrthologID pipeline (Chiu et al., 2006) that uses OrthoMCL for gene family clustering (Li et al., 2003).

Maximum likelihood (ML) phylogenies were constructed with the POSIX-threads version of RAxML v8.0.19 (Stamatakis, 2006). For NUC-SNP data we used an ascertainment bias correction and a general time-reversible (GTR) substitution model accounting for among-site rate heterogeneity using the  $\Gamma$  distribution and four rate categories (ASC\_GTRGAMMA model) for 100 individual searches with maximum parsimony random-addition starting trees. For the AA-ORF matrix we used the PROT\_GAMMA\_JTT model and the same search parameters. Node support was evaluated with 1000 nonparametric bootstrap pseudoreplicates filtering the optimal ML tree through the bootstrap trees, so that the shown node support values indicate the percent proportion of bootstrap trees that contained a given internode branch. The genome of MSHR1132, a *Staphylococcus argenteus* strain, was used as an outgroup to root the tree. Phylogenetic matrices and tree files are available as supplementary materials (Data S1, Data S2, Data S3, Data S4).

### **Metabolic gene sequence analysis**

The ten proteomes of the clinical isolates were used with the WhatsGNU tool basic function (<https://github.com/ahmedmagds/WhatsGNU>) where each protein was given a GNU (Gene Novelty Unit) score that was the number of times an exact match was found in the *S. aureus* pan proteome database. GNU scores for key components of the TCA cycle, the glycolytic pathway, and terminal components of the electron transport chain were used to produce a heatmap using pheatmap package in R. The GNU

scores of all the proteins in each isolate were then used to produce a histogram in GraphPad Prism v.7. Proteins less than 50 amino acids were excluded from the histograms.

### **Infection of human primary keratinocytes**

HEK<sub>n</sub> cells were pretreated with 10ug/ml fibronectin 1 hour prior to infection with or without 0.1M 2-deoxyglucose (2-DG) as indicated. HEK<sub>n</sub> cells were infected with bacteria at an MOI of 50 and incubated at 37°C with 5% CO<sub>2</sub>, followed by addition of lysostaphin 10ug/ml at 4 hours and cell detachment with Tryple Express at 24 hours. Supernatants were collected and used for cytotoxicity assays, fumarate measurement, or sent to Eve Technologies (Calgary, Canada) for cytokine analysis. Cytotoxicity was determined by LDH assay using multiply frozen and thawed keratinocytes as a positive control. Fumarate was measured from HEK<sub>n</sub> supernatant at 5 hours of infection using the Fumarate Assay Kit according to the manufacturer's instructions.

### **Extracellular flux analysis**

Glycolysis was measured by Seahorse technology performed according to the XF Glycolysis Stress Test Kit User Guide. HEK<sub>n</sub> cells were seeded at 30,000 cells/well in a Seahorse XF24 well plate and incubated at 37°C with 5% CO<sub>2</sub>. A sensor cartridge was calibrated as per the manufacturers' instructions overnight at 37°C without CO<sub>2</sub>. On the day of infection, the primary keratinocytes were washed once and media was replaced with XF base medium supplemented with 2 mM glutamine and 10 µg/ml fibronectin 1 hour prior to infection. The cells were infected at an MOI of 50 and incubated at 37°C without CO<sub>2</sub> for 3 hours. The oxygen consumption rate (OCR) and extracellular acidification rate (ECAR) were measured using a Seahorse XF24 analyzer. Each measurement cycle consisted of a mixing time of 3 minutes and a data acquisition period of 3 minutes (12 data points). The following reagents were added sequentially at 20-minute intervals: glucose at a final concentration of 10 mM to stimulate glycolysis, oligomycin at 1 µM to suppress oxidative phosphorylation, and 2-DG at 50 mM to inhibit glycolysis. The metabolic activity of the bacteria was determined by adding the same amount of bacteria in XF24 well plates without HEK<sub>n</sub> cells.

### **Flow cytometry**

Red blood cells were lysed from mouse skin homogenates and immune cells were recovered by centrifugation at 700G at 4°C and washed with FACS buffer (10% FBS and 0.1% sodium azide in PBS).

Cells were stained for 30 min at 4°C in presence of counting beads (Bangs Laboratories) and labeled with a combination of BV605-labelled anti-CD11c, BV421-labelled CD86, BV510-labelled CD103, PE-CF594-labelled anti-Ly6C, PerCP-Cy5.5-labelled anti-Ly6G, BV650-labelled anti-NK-1.1, AF700-labelled CD45, APC/Cy7-labeled MHCII, PE-labelled CD207, AF594-labelled anti-CD11b, and Fc block. Analysis of immune cell populations was conducted using BD LSR II (BD Biosciences). Cells in the skin were classified as follows:

Langerhans cells CD45+ CD11b+ CD11c+ MHCII+ CD207+,

Langerhans dendritic cells (DCs) CD45+ CD11b+ CD11c+ MHCII+ CD207+ CD103+,

interstitial macrophages CD45+ Ly6C- CD11b+ CD11c+ MHCII+,

Ly6C- monocytes CD45+ Ly6C- CD11b+ CD11c+ MHCII+,

CD11b+ DCs CD45+ Ly6C+ CD11b+ MHCII+ CD11c+,

neutrophils (PMNs) CD45+ Ly6C+ CD11b+ MHCII<sup>+</sup>Ly6G<sup>+</sup>.

All flow cytometry data were analyzed on FlowJo version 10.

### **Western blots and Antibodies**

HEK293 cell lysates were frozen in RIPA (1 mM Tris-HCl, pH7.5, 15 mM NaCl, 0.5 mM EDTA, 0.01% SDS, 0.1% Triton X-100, 0.1% deoxycholate) containing 1x HALT protease inhibitor cocktail (ThermoFisher Scientific). Protein concentrations were quantified using the Precision Red advanced protein kit (Cytoskeleton Inc.) and samples were standardised to a concentration of 100 µg. Blots were run using Bolt mini gels (Invitrogen) and transferred to PVDF membranes (Invitrogen) using the iBlot machine (LifeTechnologies). Antibodies for Hif1 $\alpha$ , P-S6, and  $\beta$ -actin were used according to the manufacturer's instructions. Secondary antibodies conjugated to horseradish peroxidase HRP were diluted 1:5000. Images were visualized using a digital chemiluminescent detection imager (ProteinSimple) and ImageJ.

### **RNA isolation from bacterial cells for qRT-PCR**

*S. aureus* strains were grown overnight and re-inoculated 1:100 in LB at 37°C to an OD<sub>600</sub> of 1. Bacteria were pelleted, resuspended, and incubated in cell wall lysis mixture (18ug/ml lysostaphin, 8U/ml mutanolysin, 50mg/ml lysozyme in 50uM TRIS-HCl 10uM EDTA pH 7.5) for 30 minutes at 37°C, followed by addition of TRK lysis buffer (Omega Bio-tek). After 10 minutes at room temperature, 70% ethanol was

added and samples were transferred to E.Z.N.A RNA isolation columns. RNA was isolated following the manufacturer's instructions and treated with DNase using the DNA-free DNA removal kit (Invitrogen). cDNA was synthesized using the high-capacity cDNA reverse transcription kit (Applied Biosystems). Quantitative reverse transcription-PCR (qRT-PCR) was performed using Power SYBR green PCR master mix (Applied Biosystems) in a StepOne Plus thermal cycler (Applied Biosystems). Primers used are listed in Table S3. Data were analyzed using the  $\Delta\Delta\text{CT}$  method.

### **Quantification and Statistical Analysis**

See figure legends for statistical details. Samples without normal distribution were analyzed using the nonparametric Mann-Whitney test. Samples with normal distribution were analyzed with two-tailed Student's t test and one- or two-way ANOVA followed by Dunnet's multiple comparisons test.  $p < 0.05$  between groups was considered significant. Outliers were determined by Grubb's test and removed. Statistical analysis was performed using GraphPad Prism Version 7.00 (GraphPad). Data are presented as single points with lines representing mean values or as bar graphs with mean  $\pm$  SEM.

### **Data and Software Availability**

The sequencing data from this study are available in the NCBI Biosample database under Bioproject number PRJNA520898.

| REAGENT or RESOURCE                                 | SOURCE                                                  | IDENTIFIER                      |
|-----------------------------------------------------|---------------------------------------------------------|---------------------------------|
| Antibodies                                          |                                                         |                                 |
| Rabbit polyclonal anti-Hif1 $\alpha$                | Cayman Chemical                                         | Cat#10006421                    |
| Rabbit monoclonal anti-phospho-S6 ribosomal protein | Cell Signaling                                          | Cat#4858                        |
| Mouse monoclonal anti- $\beta$ -actin               | Sigma Aldrich                                           | Cat#A5316                       |
| BV605-labeled anti-mouse CD11c antibody             | Biolegend                                               | Cat#117333;<br>RRID:AB_11204262 |
| BV421-labeled anti-mouse CD86 antibody              | Biolegend                                               | Cat#105031;<br>RRID:AB_10898329 |
| BV510-labeled anti-mouse CD103 antibody             | Biolegend                                               | Cat#121423;<br>RRID:AB_2562713  |
| PE-CF594-labeled anti-mouse Ly6C antibody           | BD Horizon                                              | Cat#562728                      |
| PerCP-Cy5.5-labeled anti-mouse Ly6G antibody        | Biolegend                                               | Cat#127615;<br>RRID:AB_1877272  |
| BV650-labeled anti-mouse NK-1.1 antibody            | Biolegend                                               | Cat#108735;<br>RRID:AB_11147949 |
| AF700-labeled anti-mouse CD45 antibody              | Biolegend                                               | Cat#103127;<br>RRID:AB_493714   |
| APC/Cy7-labeled anti-mouse MHCII antibody           | Biolegend                                               | Cat#107627;<br>RRID:AB_1659252  |
| PE-labeled anti-mouse CD207 antibody                | Biolegend                                               | Cat#144203;<br>RRID:AB_2561498  |
| AF594-labeled anti-mouse CD11b antibody             | Biolegend                                               | Cat#101254;<br>RRID:AB_2563231  |
| Anti-mouse CD16/32 antibody                         | Biolegend                                               | Cat#101319;<br>RRID:AB_1574973  |
| Goat anti-rabbit-HRP                                | Abcam                                                   | Cat#ab205718                    |
| Bacterial and Virus Strains                         |                                                         |                                 |
| <i>Staphylococcus aureus</i> USA300 WT LAC          | Anthony Richardson,<br>University of<br>Pittsburgh, USA | N/A                             |

|                                                                          |                                                                         |                  |
|--------------------------------------------------------------------------|-------------------------------------------------------------------------|------------------|
| <i>Staphylococcus aureus</i> USA300 WT JE2                               | Michael Otto, National Institute of Allergy and Infectious Diseases USA | N/A              |
| <i>Staphylococcus aureus</i> USA300 WT JE2 <i>fumC</i> transposon mutant | Nebraska Transposon Mutant Library                                      | N/A              |
| <i>Staphylococcus aureus</i> AD#1                                        | Isolate from patient                                                    | N/A              |
| <i>Staphylococcus aureus</i> AD#2                                        | Isolate from patient                                                    | N/A              |
| <i>Staphylococcus aureus</i> AD#3                                        | Isolate from patient                                                    | N/A              |
| <i>Staphylococcus aureus</i> AD#4                                        | Isolate from patient                                                    | N/A              |
| <i>Staphylococcus aureus</i> AD#5                                        | Isolate from patient                                                    | N/A              |
| <i>Staphylococcus aureus</i> AD#6                                        | Isolate from patient                                                    | N/A              |
| <i>Staphylococcus aureus</i> AD#7                                        | Isolate from patient                                                    | N/A              |
| <i>Staphylococcus aureus</i> AD#8                                        | Isolate from patient                                                    | N/A              |
| <i>Staphylococcus aureus</i> AD#9                                        | Isolate from patient                                                    | N/A              |
| <i>Staphylococcus aureus</i> AD#10                                       | Isolate from patient                                                    | N/A              |
| Chemicals, Peptides, and Recombinant Proteins                            |                                                                         |                  |
| Human fibronectin                                                        | Corning                                                                 | Cat#354008       |
| 2-Deoxyglucose                                                           | Sigma-Aldrich                                                           | Cat#D6134        |
| Lysostaphin                                                              | Sigma-Aldrich                                                           | Cat#L7386        |
| Power SYBR green PCR master mix                                          | Applied Biosystems                                                      | Cat# 4367659     |
| Mutanolysin                                                              | Sigma-Aldrich                                                           | Cat# M9901       |
| Critical Commercial Assays                                               |                                                                         |                  |
| LDH Cytotoxicity Assay                                                   | Roche                                                                   | Cat#11644793001  |
| Fumarate Assay Kit                                                       | Abcam                                                                   | Cat# ab102516    |
| Seahorse XF Glycolysis Stress Test Kit                                   | Agilent                                                                 | Cat# 103020-100  |
| Qubit dsDNA High Sensitivity Assay Kit                                   | Invitrogen                                                              | Cat# Q32851      |
| Nextera XT DNA Library Preparation Kit                                   | Illumina                                                                | Cat# FC-131-1024 |
| E.Z.N.A Total RNA Isolation kit                                          | Omega Bio-tek                                                           | Cat# R6834-02    |

|                                              |                      |                                                                                                                       |
|----------------------------------------------|----------------------|-----------------------------------------------------------------------------------------------------------------------|
|                                              |                      |                                                                                                                       |
|                                              |                      |                                                                                                                       |
| Deposited Data                               |                      |                                                                                                                       |
|                                              |                      |                                                                                                                       |
|                                              |                      |                                                                                                                       |
|                                              |                      |                                                                                                                       |
|                                              |                      |                                                                                                                       |
| Experimental Models: Cell Lines              |                      |                                                                                                                       |
| Human primary keratinocytes, neonatal (HEKn) | Gibco                | Cat#C0015C                                                                                                            |
| Experimental Models: Organisms/Strains       |                      |                                                                                                                       |
| C57BL/6J                                     | Jackson Laboratories | Stock No. 000664                                                                                                      |
| Oligonucleotides                             |                      |                                                                                                                       |
| Primers, see Table S***                      |                      |                                                                                                                       |
|                                              |                      |                                                                                                                       |
|                                              |                      |                                                                                                                       |
|                                              |                      |                                                                                                                       |
|                                              |                      |                                                                                                                       |
| Software and Algorithms                      |                      |                                                                                                                       |
| Seahorse XFe24 analyzer                      | Agilent              | N/A                                                                                                                   |
| FlowJo                                       | FlowJo               | <a href="http://flowjo.com">http://flowjo.com</a>                                                                     |
| RAST server                                  |                      | <a href="http://rast.theseed.org/FIG/rast.cgi">http://rast.theseed.org/FIG/rast.cgi</a>                               |
| ABYSS 1.3.2                                  |                      | <a href="http://www.bcgsc.ca/platform/bioinfo/software/abyss">http://www.bcgsc.ca/platform/bioinfo/software/abyss</a> |
| SAMtools                                     |                      | <a href="http://samtools.sourceforge.net/">http://samtools.sourceforge.net/</a>                                       |

|        |          |                                                                             |
|--------|----------|-----------------------------------------------------------------------------|
| MUMmer |          | <a href="http://mummer.sourceforge.net/">http://mummer.sourceforge.net/</a> |
| Prism7 | Graphpad | <a href="http://www.graphpad.com">http://www.graphpad.com</a>               |
| Other  |          |                                                                             |
|        |          |                                                                             |
|        |          |                                                                             |
|        |          |                                                                             |
|        |          |                                                                             |
|        |          |                                                                             |
